# Supplementary material
Source: PubMed Central journal article supplement (PMC9160207)
Supplement: NIHMS1765926-supplement-1.pdf [file NIHMS1765926-supplement-1.pdf]

**Table S1. Properties of SCN PER2::LUC rhythms ( $\pm$  SEM) prior to manipulation (averaged across slice position).**

| Experiment           | Manipulation               | Genotype                                  | Sex         | n          | Phase (CT)                        | Period (h)                          | Damping (days)                   | Prediction Error (h)               |
|----------------------|----------------------------|-------------------------------------------|-------------|------------|-----------------------------------|-------------------------------------|----------------------------------|------------------------------------|
| 1a <sup>§</sup>      | V1A/B Dose, +V1A/B Antag   | PER2::LUC                                 | <b>Both</b> | <b>56</b>  | <b>10.8 <math>\pm</math> 0.1</b>  | <b>24.47 <math>\pm</math> 0.04*</b> | <b>3.8 <math>\pm</math> 0.2</b>  | <b>0.03 <math>\pm</math> 0.03</b>  |
|                      |                            |                                           | Female      | 26         | 10.9 $\pm$ 0.1                    | 24.58 $\pm$ 0.06                    | 3.6 $\pm$ 0.4                    | 0.07 $\pm$ 0.06                    |
|                      |                            |                                           | Male        | 30         | 10.8 $\pm$ 0.1                    | 24.37 $\pm$ 0.05                    | 3.9 $\pm$ 0.2                    | -0.003 $\pm$ 0.02                  |
| 1b <sup>§</sup>      | V1A, V1B                   | PER2::LUC                                 | <b>Both</b> | <b>46</b>  | <b>11.3 <math>\pm</math> 0.2</b>  | <b>24.51 <math>\pm</math> 0.04*</b> | <b>3.9 <math>\pm</math> 0.3</b>  | <b>-0.02 <math>\pm</math> 0.04</b> |
|                      |                            |                                           | Female      | 22         | 11.6 $\pm$ 0.3                    | 24.65 $\pm$ 0.05                    | 3.6 $\pm$ 0.3                    | 0.06 $\pm$ 0.07                    |
|                      |                            |                                           | Male        | 24         | 11.1 $\pm$ 0.3                    | 24.38 $\pm$ 0.06                    | 4.1 $\pm$ 0.5                    | -0.02 $\pm$ 0.03                   |
| 2 <sup>§</sup>       | PRC                        | PER2::LUC                                 | <b>Both</b> | <b>53</b>  | <b>10.8 <math>\pm</math> 0.1*</b> | <b>24.54 <math>\pm</math> 0.03</b>  | <b>3.4 <math>\pm</math> 0.1</b>  | <b>0.01 <math>\pm</math> 0.02</b>  |
|                      |                            |                                           | Female      | 24         | 11.0 $\pm$ 0.2                    | 24.54 $\pm$ 0.05                    | 3.2 $\pm$ 0.1                    | -0.03 $\pm$ 0.02                   |
|                      |                            |                                           | Male        | 29         | 10.7 $\pm$ 0.1                    | 24.53 $\pm$ 0.04                    | 3.5 $\pm$ 0.2                    | 0.04 $\pm$ 0.03                    |
| 3 <sup>§</sup>       | PLC, AC Inhibitors         | PER2::LUC                                 | <b>Both</b> | <b>37</b>  | <b>11.2 <math>\pm</math> 0.1</b>  | <b>24.51 <math>\pm</math> 0.03*</b> | <b>4.0 <math>\pm</math> 0.2*</b> | <b>-0.02 <math>\pm</math> 0.02</b> |
|                      |                            |                                           | Female      | 21         | 11.0 $\pm$ 0.1                    | 24.63 $\pm$ 0.04                    | 3.5 $\pm$ 0.9                    | -0.06 $\pm$ 0.02                   |
|                      |                            |                                           | Male        | 16         | 10.9 $\pm$ 0.2                    | 24.48 $\pm$ 0.03                    | 4.1 $\pm$ 0.2                    | -0.02 $\pm$ 0.03                   |
| 4a <sup>§</sup>      | VIP WT                     | <i>Vip</i> <sup>+/+</sup> ; PER2::LUC     | <b>Both</b> | <b>28</b>  | <b>10.8 <math>\pm</math> 0.2</b>  | <b>24.45 <math>\pm</math> 0.06*</b> | <b>3.2 <math>\pm</math> 0.1</b>  | <b>0.04 <math>\pm</math> 0.06</b>  |
|                      |                            |                                           | Female      | 12         | 11.1 $\pm$ 0.2                    | 24.62 $\pm$ 0.07                    | 3.0 $\pm$ 0.1                    | 0.14 $\pm$ 0.13                    |
|                      |                            |                                           | Male        | 16         | 10.7 $\pm$ 0.2                    | 24.32 $\pm$ 0.07                    | 3.3 $\pm$ 0.1                    | -0.03 $\pm$ 0.04                   |
|                      | VIP Deficient Heterozygous | <i>Vip</i> <sup>cre/+</sup> ; PER2::LUC   | <b>Both</b> | <b>17</b>  | <b>10.5 <math>\pm</math> 0.1</b>  | <b>24.34 <math>\pm</math> 0.05*</b> | <b>3.7 <math>\pm</math> 0.1*</b> | <b>0.04 <math>\pm</math> 0.05</b>  |
|                      |                            |                                           | Female      | 10         | 10.4 $\pm$ 0.2 <sup>‡</sup>       | 24.21 $\pm$ 0.05 <sup>‡</sup>       | 3.5 $\pm$ 0.1 <sup>‡</sup>       | 0.005 $\pm$ 0.05                   |
|                      |                            |                                           | Male        | 7          | 10.7 $\pm$ 0.3                    | 24.51 $\pm$ 0.07                    | 3.9 $\pm$ 0.1 <sup>‡</sup>       | -0.10 $\pm$ 0.1                    |
|                      | VIP Deficient Homozygous   | <i>Vip</i> <sup>cre/cre</sup> ; PER2::LUC | <b>Both</b> | <b>16</b>  | <b>10.1 <math>\pm</math> 0.1</b>  | <b>24.45 <math>\pm</math> 0.05</b>  | <b>4.4 <math>\pm</math> 0.1</b>  | <b>0.01 <math>\pm</math> 0.03</b>  |
|                      |                            |                                           | Female      | 10         | 10.0 $\pm$ 0.1 <sup>‡</sup>       | 24.39 $\pm$ 0.05 <sup>‡</sup>       | 4.4 $\pm$ 0.1 <sup>‡</sup>       | 0.02 $\pm$ 0.04                    |
|                      |                            |                                           | Male        | 6          | 10.1 $\pm$ 0.3                    | 24.55 $\pm$ 0.08 <sup>‡</sup>       | 4.5 $\pm$ 0.3 <sup>‡</sup>       | -0.01 $\pm$ 0.04                   |
| 4b <sup>§</sup>      | VPAC2 Antagonist           | PER2::LUC                                 | <b>Both</b> | <b>12</b>  | <b>11.2 <math>\pm</math> 0.2</b>  | <b>24.53 <math>\pm</math> 0.05</b>  | <b>3.5 <math>\pm</math> 0.1</b>  | <b>-0.04 <math>\pm</math> 0.03</b> |
|                      |                            |                                           | Female      | 6          | 11.4 $\pm$ 0.2                    | 24.54 $\pm$ 0.07                    | 3.3 $\pm$ 0.1                    | 0.01 $\pm$ 0.04                    |
|                      |                            |                                           | Male        | 6          | 10.9 $\pm$ 0.2                    | 24.51 $\pm$ 0.08                    | 3.6 $\pm$ 0.2                    | -0.08 $\pm$ 0.03                   |
| Overall <sup>§</sup> | Multiple                   | PER2::LUC WT                              | <b>Both</b> | <b>204</b> | <b>11.1 <math>\pm</math> 0.1*</b> | <b>24.52 <math>\pm</math> 0.02*</b> | <b>3.8 <math>\pm</math> 0.1</b>  | <b>-0.01 <math>\pm</math> 0.01</b> |
|                      |                            |                                           | Female      | 99         | 11.2 $\pm$ 0.1                    | 24.57 $\pm$ 0.02                    | 3.6 $\pm$ 0.1                    | -0.06 $\pm$ 0.03                   |
|                      |                            |                                           | Male        | 105        | 10.9 $\pm$ 0.1                    | 24.48 $\pm$ 0.03                    | 3.9 $\pm$ 0.2                    | -0.10 $\pm$ 0.02                   |

<sup>§</sup>1a- **Phase:**  $t(54) = -0.4, p > 0.6$ , **Period:**  $t(54) = -2.5, p = 0.02$ , **Damping:**  $t(54) = 0.6, p > 0.5$ , **Prediction Error:**  $t(54) = -1.1, p > 0.2$

<sup>§</sup>1b- **Phase:**  $t(44) = -1.15, p > 0.2$ , **Period:**  $t(44) = -3.6, p < 0.001$ , **Damping:**  $t(44) = 0.7, p > 0.4$ , **Prediction Error:**  $t(44) = -1.1, p > 0.2$

<sup>§</sup>2- **Phase:**  $t(51) = -1.7, p = 0.09$ , **Period:**  $t(51) = -0.07, p > 0.9$ , **Damping:**  $t(51) = 1.0, p > 0.3$ , **Prediction Error:**  $t(51) = -1.9, p = 0.06$

<sup>§</sup>3- **Phase:**  $t(35) = -0.4, p > 0.7$ , **Period:**  $t(35) = -2.6, p = 0.01$ , **Damping:**  $t(35) = 3.3, p < 0.05$ , **Prediction Error:**  $t(35) = 1.1, p > 0.2$

<sup>§</sup>4a- **Phase:** Genotype:  $F(2,55) = 6.5, p = 0.003$ , Sex:  $F(1,55) = 0.01, p > 0.9$ , Genotype\*Sex:  $F(2,55) = 1.5, p > 0.2$ , **Period:** Genotype:  $F(2,55) = 1.6, p > 0.2$ , Sex:  $F(1,55) = 0.9, p > 0.3$ , Genotype\*Sex:  $F(2,55) = 11.7, p < 0.0001$ , **Damping:** Genotype:  $F(2,55) = 1.7, p > 0.1$ , Sex:  $F(1,55) = 0.01, p > 0.9$ , Genotype\*Sex:  $F(2,55) = 0.09, p > 0.9$ , **Prediction Error:** Genotype:  $F(2,55) = 0.2, p > 0.7$ , Sex:  $F(1,55) = 0.3, p > 0.6$ , Genotype\*Sex:  $F(2,55) = 1.5, p > 0.2$

<sup>§</sup>4b- **Phase:**  $t(10) = -1.7, p = 0.09$ , **Period:**  $t(10) = -0.2, p > 0.8$ , **Damping:**  $t(10) = 1.43, p > 0.1$ , **Prediction Error:**  $t(10) = -1.7, p > 0.1$

<sup>§</sup>Overall- **Phase:**  $t(210) = -2.2, p = 0.03$ , **Period:**  $t(210) = -2.4, p = 0.02$ , **Damping:**  $t(210) = 1.8, p = 0.7$ , **Prediction Error:**  $t(210) = -1.3, p > 0.2$

\* Sex difference,  $p < 0.05$ . <sup>‡</sup> Genotype difference,  $p < 0.05$

Table S2. Properties of SCN PER2::LUC rhythms ( $\pm$ SEM) after treatment (averaged across slice position).

| Experiment                         | Manipulation                       | V1 Group   | n                       | Phase Shift (h)          |                         |                          | Period Difference (h)    |                          |                         | Damping (days)         |                        |                        |
|------------------------------------|------------------------------------|------------|-------------------------|--------------------------|-------------------------|--------------------------|--------------------------|--------------------------|-------------------------|------------------------|------------------------|------------------------|
|                                    |                                    |            |                         | Both                     | Female                  | Male                     | Both                     | Female                   | Male                    | Both                   | Female                 | Male                   |
| 1a <sup>§</sup>                    | 0uM                                | Vehicle    | 10                      | 0.3 ± 0.2                | 0.5 ± 0.2               | 0.0 ± 0.2                | 0.02 ± 0.2               | 0.21 ± 0.2               | -0.16 ± 0.3             | 4.2 ± 0.5              | 3.8 ± 0.9              | 4.6 ± 0.3              |
|                                    | 1uM                                | Agonists   | 7                       | -0.4 ± 0.2 <sup>#</sup>  | -0.2 ± 0.3 <sup>#</sup> | -0.7 ± 0.2               | -0.31 ± 0.3              | -0.57 ± 0.5 <sup>#</sup> | 0.03 ± 0.3              | 4.3 ± 0.5              | 4.9 ± 0.7              | 3.5 ± 0.6              |
|                                    | 5uM                                | Agonists   | 7                       | -0.1 ± 0.1               | -0.2 ± 0.2 <sup>#</sup> | -0.1 ± 0.1               | -0.48 ± 0.3 <sup>#</sup> | -0.32 ± 0.4              | -0.70 ± 0.3             | 3.7 ± 0.5              | 3.8 ± 0.9              | 3.6 ± 0.5              |
|                                    | 10uM                               | Agonists   | 18                      | -0.9 ± 0.1 <sup>#*</sup> | -1.3 ± 0.3 <sup>#</sup> | -0.6 ± 0.1 <sup>#</sup>  | 0.08 ± 0.1               | -0.05 ± 0.1              | 0.16 ± 0.1              | 3.5 ± 0.4              | 2.9 ± 0.2              | 3.9 ± 0.6              |
|                                    | 50uM                               | Agonists   | 5                       | 0.0 ± 0.3                | 0.2 ± 0.3               | -0.1 ± 0.5               | -0.53 ± 0.1 <sup>#</sup> | -0.80 ± 0.2 <sup>#</sup> | -0.35 ± 0.1             | 5.0 ± 1.0              | 5.4 ± 2.5              | 4.8 ± 1.1              |
| 1b <sup>§</sup>                    | V1 Antagonists                     | Agonists   | 9                       | 0.2 ± 0.3                | 0.0 ± 0.5               | 0.3 ± 0.3                | 0.33 ± 0.2 <sup>*</sup>  | 0.74 ± 0.4               | 0.01 ± 0.2              | 3.6 ± 0.4              | 3.2 ± 0.5              | 4.0 ± 0.7              |
|                                    | Vehicle                            | Vehicle    | 23                      | -0.1 ± 0.1               | 0.3 ± 0.1               | -0.2 ± 0.2               | -0.08 ± 0.1              | -0.11 ± 0.1              | -0.04 ± 0.1             | 4.9 ± 0.7              | 4.1 ± 0.6              | 6.1 ± 1.3              |
|                                    | V1A/B                              | Agonists   | 35                      | -0.7 ± 0.1 <sup>#</sup>  | -0.8 ± 0.2 <sup>#</sup> | -0.5 ± 0.1               | 0.12 ± 0.1               | 0.06 ± 0.1               | 0.18 ± 0.1              | 3.8 ± 0.4              | 3.1 ± 0.2              | 4.3 ± 0.7              |
|                                    | V1A                                | Agonist    | 9                       | -0.4 ± 0.2 <sup>#</sup>  | -0.5 ± 0.1 <sup>#</sup> | -0.4 ± 0.5               | -0.27 ± 0.2              | -0.29 ± 0.1              | -0.17 ± 0.1             | 3.3 ± 0.5              | 3.2 ± 0.4              | 3.5 ± 0.9              |
|                                    | V1B                                | Agonist    | 8                       | -0.2 ± 0.2               | -0.2 ± 0.3              | -0.3 ± 0.1               | -0.34 ± 0.2              | -0.08 ± 0.2              | -0.30 ± 0.1             | 3.6 ± 0.3              | 3.1 ± 0.3              | 4.5 ± 0.2              |
| 2 <sup>§</sup>                     | CT04                               | Vehicle    | 6                       | 0.6 ± 0.2                | 0.8 ± 0.2               | 0.3 ± 0.4                | 0.20 ± 0.2               | 0.35 ± 0.1               | 0.06 ± 0.3              | 4.8 ± 0.6              | 4.5 ± 1.1              | 5.0 ± 0.5              |
|                                    | CT10                               | Agonists   | 11                      | 0.0 ± 0.1 <sup>#</sup>   | 0.1 ± 0.1               | -0.1 ± 0.2               | 0.10 ± 0.1               | 0.04 ± 0.2               | 0.16 ± 0.1              | 4.0 ± 0.7              | 3.1 ± 0.2              | 4.8 ± 1.3              |
|                                    |                                    | Vehicle    | 8                       | -0.4 ± 0.2               | -0.4 ± 0.2              | -0.4 ± 0.3               | 0.10 ± 0.1               | -0.12 ± 0.2              | 0.32 ± 0.1              | 3.2 ± 0.3              | 3.6 ± 0.5              | 2.9 ± 0.2              |
|                                    | CT16                               | Agonists   | 10                      | 0.0 ± 0.2                | 0.2 ± 0.1               | -0.1 ± 0.4               | 0.01 ± 0.1               | 0.16 ± 0.1               | 0.01 ± 0.1              | 4.1 ± 0.5              | 3.5 ± 0.5              | 4.5 ± 0.7              |
|                                    |                                    | Vehicle    | 9                       | -0.5 ± 0.2               | -0.4 ± 0.3              | -0.7 ± 0.3               | -0.38 ± 0.1 <sup>*</sup> | -0.45 ± 0.2              | -0.32 ± 0.1             | 2.8 ± 0.5              | 3.3 ± 0.6              | 3.2 ± 0.4              |
|                                    | CT22                               | Agonists   | 9                       | -1.1 ± 0.1 <sup>#</sup>  | -1.0 ± 0.3              | -1.2 ± 0.1               | -0.38 ± 0.1 <sup>*</sup> | -0.74 ± 0.2              | -0.09 ± 0.1             | 5.2 ± 0.7 <sup>#</sup> | 4.6 ± 0.4              | 5.7 ± 1.3 <sup>#</sup> |
|                                    |                                    | Vehicle    | 10                      | 0.3 ± 0.2                | 0.5 ± 0.2               | 0.0 ± 0.2                | 0.05 ± 0.1               | 0.06 ± 0.2               | 0.04 ± 0.2              | 4.2 ± 0.5              | 3.8 ± 0.9              | 4.6 ± 0.3              |
| 3 <sup>§</sup>                     | PLC Inhibitor                      | Agonists   | 18                      | -0.9 ± 0.2 <sup>#*</sup> | -1.3 ± 0.2 <sup>#</sup> | -0.6 ± 0.1 <sup>#</sup>  | 0.29 ± 0.1               | 0.20 ± 0.3               | 0.34 ± 0.1              | 3.5 ± 0.4              | 2.9 ± 0.2              | 3.9 ± 0.6              |
|                                    |                                    | Vehicle    | 25                      | 0.1 ± 0.1                | 0.3 ± 0.1               | -0.2 ± 0.2               | -0.16 ± 0.1              | -0.06 ± 0.2              | -0.30 ± 0.2             | 4.4 ± 0.5              | 4.0 ± 0.6              | 5.1 ± 1.0              |
|                                    | AC Inhibitor                       | Agonists   | 37                      | -0.7 ± 0.1 <sup>#</sup>  | -0.8 ± 0.2 <sup>#</sup> | -0.6 ± 0.1               | 0.00 ± 0.1               | -0.08 ± 0.1              | 0.08 ± 0.1              | 3.5 ± 0.3              | 3.4 ± 0.4              | 3.6 ± 0.4              |
|                                    |                                    | Vehicle    | 6                       | -0.8 ± 0.2 <sup>†</sup>  | -0.6 ± 0.2 <sup>†</sup> | -1.1 ± 0.2               | -0.28 ± 0.2              | -0.29 ± 0.3              | -0.29 ± 0.3             | 4.0 ± 0.8              | 4.3 ± 1.2              | 3.5 ± 1.0              |
|                                    | PLC+AC Inhibitors                  | Agonists   | 7                       | -0.4 ± 0.2               | -0.3 ± 0.3              | -0.5 ± 0.2               | -0.40 ± 0.3              | -0.32 ± 0.4              | -0.32 ± 0.4             | 4.4 ± 1.0              | 3.4 ± 0.6              | 5.8 ± 2.2              |
| Vehicle                            |                                    | 6          | -0.9 ± 0.2 <sup>†</sup> | -0.9 ± 0.3 <sup>†</sup>  | -0.9 ± 0.5              | -0.20 ± 0.2              | -0.15 ± 0.0              | -0.15 ± 0.0              | 6.3 ± 0.6               | 6.3 ± 1.0              | 6.5 ± 0.4              |                        |
| Agonists                           |                                    | 7          | -0.6 ± 0.3              | -0.7 ± 0.6               | -0.5 ± 0.2              | -0.18 ± 0.1              | -0.65 ± 0.2              | 0.05 ± 0.2               | 4.9 ± 1.1               | 5.1 ± 1.9              | 4.7 ± 0.9              |                        |
| 4a <sup>§</sup>                    | Vip <sup>cre/+</sup> ; PER2::LUC   | Vehicle    | 6                       | -0.5 ± 0.5               | -0.5 ± 0.3              | -0.5 ± 1.1               | -0.14 ± 0.3              | -0.11 ± 0.5              | 0.00 ± 0.4              | 6.3 ± 2.1              | 8.3 ± 4.0 <sup>†</sup> | 4.4 ± 1.6              |
|                                    |                                    | Agonists   | 9                       | 0.6 ± 0.3 <sup>#*</sup>  | 0.0 ± 0.3               | 1.0 ± 0.4 <sup>#</sup>   | 0.08 ± 0.1 <sup>*</sup>  | -0.16 ± 0.3              | 0.72 ± 0.2              | 6.3 ± 1.5 <sup>*</sup> | 9.1 ± 2.6              | 4.0 ± 0.8              |
|                                    | Vip <sup>cre/cre</sup> ; PER2::LUC | Vehicle    | 10                      | 0.3 ± 0.2                | 0.5 ± 0.2               | 0.0 ± 0.2                | 0.02 ± 0.2               | 0.21 ± 0.2               | -0.16 ± 0.3             | 4.9 ± 0.8              | 3.8 ± 0.9              | 5.9 ± 1.3              |
|                                    |                                    | Agonists   | 18                      | -0.9 ± 0.1 <sup>#*</sup> | -1.3 ± 0.2 <sup>#</sup> | -0.6 ± 0.1               | 0.08 ± 0.1               | -0.05 ± 0.1              | 0.16 ± 0.1              | 3.5 ± 0.4              | 2.9 ± 0.2              | 3.9 ± 0.6              |
|                                    |                                    | Vehicle    | 8                       | -0.2 ± 0.3               | 0.0 ± 0.4               | -0.7 ± 0.2               | -0.17 ± 0.1              | 0.00 ± 0.1               | -0.44 ± 0.3             | 5.0 ± 0.6              | 5.6 ± 0.9              | 4.2 ± 0.2              |
| Vip <sup>cre/cre</sup> ; PER2::LUC | Agonists                           | 9          | -0.3 ± 0.3              | -0.5 ± 0.4               | -0.4 ± 0.3              | -0.04 ± 0.2 <sup>*</sup> | 0.22 ± 0.2               | -0.46 ± 0.2              | 3.3 ± 0.4               | 3.5 ± 0.5              | 2.6 ± 0.9              |                        |
|                                    | Vehicle                            | 7          | -0.2 ± 0.2              | -0.0 ± 0.2               | -0.5 ± 0.4              | -0.06 ± 0.2              | -0.06 ± 0.2              | -0.06 ± 0.1              | 6.5 ± 1.1               | 6.4 ± 1.3              | 6.7 ± 2.9              |                        |
| 4b <sup>§</sup>                    | VPAC2 Antagonist                   | Agonists   | 9                       | -0.2 ± 0.2               | 0.0 ± 0.3               | -0.4 ± 0.3               | 0.03 ± 0.1               | 0.20 ± 0.1               | -0.19 ± 0.2             | 4.8 ± 0.8              | 5.5 ± 1.6              | 4.2 ± 0.4              |
|                                    |                                    | Vehicle    | 22                      | 0.1 ± 0.1                | 0.3 ± 0.1               | -0.1 ± 0.1               | -0.17 ± 0.1              | -0.06 ± 0.2              | -0.36 ± 0.2             | 3.3 ± 0.5              | 4.0 ± 0.6              | 4.9 ± 1.1              |
|                                    | VPAC2 Vehicle                      | Agonists   | 36                      | -0.7 ± 0.1 <sup>#</sup>  | -0.8 ± 0.2 <sup>#</sup> | -0.6 ± 0.1 <sup>#</sup>  | -0.02 ± 0.1              | -0.08 ± 0.1              | 0.05 ± 0.1 <sup>#</sup> | 4.5 ± 0.3              | 3.4 ± 0.4              | 3.6 ± 0.4              |
|                                    |                                    | Vehicle    | 6                       | -0.4 ± 0.2               | 0.0 ± 0.2               | -0.7 ± 0.1               | -0.48 ± 0.1              | -0.56 ± 0.2              | -0.41 ± 0.1             | 3.0 ± 0.3              | 3.0 ± 0.6              | 3.0 ± 0.4              |
| Agonists                           | 6                                  | -0.3 ± 0.3 | 0.1 ± 0.2               | -0.6 ± 0.1               | -0.52 ± 0.1             | -0.36 ± 0.1              | -0.68 ± 0.3              | 4.7 ± 1.3                | 5.2 ± 2.5               | 4.2 ± 1.4              |                        |                        |

<sup>§</sup>1a Phase Shift FF ANOVA, Concentration:  $F(4,46) = 10.7, p < 0.001$ , Sex:  $F(1,46) = 0.5, p > 0.4$ , Concentration\*Sex:  $F(4,46) = 3.2, p = 0.02$ , Period Difference FF ANOVA, Concentration:  $F(4,46) = 2.6, p = 0.05$ , Sex:  $F(1,46) = 0.4, p > 0.5$ , Concentration\*Sex:  $F(4,46) = 1.4, p > 0.2$ , Damping FF ANOVA, Concentration:  $F(4,44) = 1.4, p > 0.2$ , Sex:  $F(1,44) = 0.0, p > 0.8$ , Concentration\*Sex:  $F(4,44) = 0.9, p > 0.4$

<sup>§</sup>1b Phase Shift FF ANOVA, Drug Group:  $F(2,36) = 18.4, p < 0.001$ , Sex:  $F(1,36) = 0.8, p > 0.3$ , Drug Group\*Sex:  $F(2,36) = 3.4, p = 0.05$ , Period Difference FF ANOVA, Drug Group:  $F(2,36) = 1.9, p > 0.1$ , Sex:  $F(1,36) = 3.8, p = 0.06$ , Drug Group\*Sex:  $F(2,36) = 3.6, p = 0.04$ , Damping FF ANOVA, Drug Group:  $F(2,35) = 2.4, p = 0.1$ , Sex:  $F(1,35) = 4.5, p = 0.04$ , Drug Group\*Sex:  $F(2,35) = 0.4, p > 0.6$

<sup>§</sup>1c Phase Shift FF ANOVA, V1 Agonist:  $F(3,76) = 6.3, p < 0.001$ , Sex:  $F(1,76) = 0.1, p > 0.7$ , V1 Agonist\*Sex:  $F(3,76) = 2.1, p = 0.1$ , Period Difference FF ANOVA, V1 Agonist:  $F(3,73) = 1.4, p > 0.2$ , Sex:  $F(1,73) = 0.2, p > 0.6$ , V1 Agonist\*Sex:  $F(3,73) = 0.5, p > 0.6$ , Damping FF ANOVA, V1 Agonist:  $F(3,68) = 2.1, p > 0.1$ , Sex:  $F(1,68) = 2.4, p > 0.1$ , V1 Agonist\*Sex:  $F(3,68) = 0.2, p > 0.9$

<sup>§</sup>2 Phase Shift FF ANOVA, Drug Group:  $F(1,80) = 18.4, p < 0.001$ , Sex:  $F(1,80) = 1.4, p > 0.2$ , Drug Group\*Sex:  $F(1,80) = 2.4, p > 0.1$ , CT:  $F(3,80) = 11.9, p < 0.001$ , Drug Group\*CT:  $F(3,80) = 9.8, p < 0.001$ , Sex\*CT:  $F(3,80) = 1.1, p > 0.3$ , Drug Group\*Sex\*CT:  $F(3,80) = 2.6, p = 0.06$ , Period Difference FF ANOVA, Drug Group:  $F(1,80) = 1.3, p > 0.2$ , Sex:  $F(1,80) = 4.9, p = 0.03$ , Drug Group\*Sex:  $F(1,80) = 0.1, p > 0.7$ , CT:  $F(3,80) = 16.7, p < 0.001$ , Drug Group\*CT:  $F(3,80) = 0.5, p > 0.7$ , Sex\*CT:  $F(3,80) = 2.7, p = 0.05$ , Drug Group\*Sex\*CT:  $F(3,80) = 2.2, p = 0.09$ , Damping FF ANOVA, Drug Group:  $F(1,77) = 0.4, p > 0.5$ , Sex:  $F(1,77) = 2.8, p = 0.1$ , Drug Group\*Sex:  $F(1,77) = 1.9, p > 0.1$ , CT:  $F(3,77) = 0.7, p > 0.5$ , Drug Group\*CT:  $F(3,77) = 3.0, p = 0.04$ , Sex\*CT:  $F(3,77) = 0.3, p > 0.8$ , Drug Group\*Sex\*CT:  $F(3,77) = 0.2, p > 0.9$

<sup>§</sup>3 Phase Shift FF ANOVA, V1 Agonist:  $F(1,98) = 2.1, p > 0.1$ , Inhibitor:  $F(3,98) = 3.6, p = 0.02$ , V1 Agonist\*Inhibitor:  $F(3,98) = 8.2, p < 0.001$ , Sex:  $F(1,98) = 0.0, p > 0.9$ , V1 Agonist\*Sex:  $F(1,198) = 2.7, p > 0.1$ , Inhibitor\*Sex:  $F(3,98) = 1.2, p > 0.3$ , V1 Agonist\*Inhibitor\*Sex:  $F(3,98) = 0.3, p > 0.8$ , Period Difference FF ANOVA, V1 Agonist:  $F(1,98) = 0.1, p > 0.7$ , Inhibitor:  $F(3,98) = 1.7, p > 0.1$ , V1 Agonist\*Inhibitor:  $F(3,98) = 0.9, p > 0.4$ , Sex:  $F(1,98) = 2.4, p > 0.1$ , V1 Agonist\*Sex:  $F(1,98) = 4.2, p = 0.04$ , Inhibitor\*Sex:  $F(3,98) = 1.1, p > 0.3$ , V1 Agonist\*Inhibitor\*Sex:  $F(3,98) = 0.3, p > 0.8$ , Damping FF ANOVA, V1 Agonist:  $F(1,96) = 0.4, p > 0.5$ , Inhibitor:  $F(3,96) = 4.3, p = 0.01$ , V1 Agonist\*Inhibitor:  $F(3,96) = 0.7, p > 0.5$ , Sex:  $F(1,96) = 1.5, p > 0.2$ , V1 Agonist\*Sex:  $F(1,96) = 0.0, p > 0.9$ , Inhibitor\*Sex:  $F(3,96) = 4.0, p = 0.01$ , V1 Agonist\*Inhibitor\*Sex:  $F(3,96) = 0.6, p > 0.6$

<sup>§</sup>4a Phase Shift FF ANOVA, Genotype:  $F(2,59) = 0.2, p > 0.8$ , Drug Group:  $F(1,59) = 4.2, p = 0.05$ , Genotype\*Drug Group:  $F(2,59) = 6.6, p < 0.005$ , Sex:  $F(1,59) = 0.8, p > 0.3$ , Genotype\*Sex:  $F(2,59) = 0.7, p > 0.4$ , Drug Group\*Sex:  $F(1,59) = 4.4, p = 0.04$ , Genotype\*Drug Group\*Sex:  $F(2,59) = 1.0, p > 0.3$ , Period Difference FF ANOVA, Genotype:  $F(2,59) = 1.4, p > 0.2$ , Drug Group:  $F(1,59) = 0.4, p > 0.5$ , Genotype\*Drug Group:  $F(2,59) = 0.0, p > 0.9$ , Sex:  $F(1,59) = 6.7, p = 0.01$ , Genotype\*Sex:  $F(2,59) = 1.8, p > 0.1$ , Drug Group\*Sex:  $F(1,59) = 0.0, p > 0.9$ , Genotype\*Drug Group\*Sex:  $F(2,59) = 2.3, p = 0.11$ , Damping FF ANOVA, Genotype:  $F(2,55) = 3.2, p = 0.05$ , Drug Group:  $F(1,55) = 8.0, p = 0.01$ , Genotype\*Drug Group:  $F(2,55) = 0.0, p > 0.9$ , Sex:  $F(1,55) = 0.0, p > 0.9$ , Genotype\*Sex:  $F(2,55) = 2.3, p = 0.11$ , Drug Group\*Sex:  $F(1,55) = 0.4, p > 0.5$ , Genotype\*Drug Group\*Sex:  $F(2,55) = 0.2, p > 0.7$

<sup>§</sup>4b Phase Shift FF ANOVA, VPAC2 Antagonist:  $F(1,69) = 0.0, p > 0.9$ , V1 Agonist:  $F(1,69) = 3.8, p = 0.06$ , VPAC2 Antagonist\*V1 Agonist:  $F(1,69) = 6.3, p = 0.01$ , Sex:  $F(1,69) = 5.2, p = 0.03$ , VPAC2 Antagonist\*Sex:  $F(1,69) = 3.8, p = 0.06$ , V1 Agonist\*Sex:  $F(1,69) = 0.8, p > 0.3$ , VPAC2 Antagonist\*V1 Agonist\*Sex:  $F(1,69) = 0.8, p > 0.3$ , Period Difference FF ANOVA, VPAC2 Antagonist:  $F(1,69) = 6.7, p = 0.01$ , V1 Agonist:  $F(1,69) = 0.3, p > 0.6$ , VPAC2 Antagonist\*V1 Agonist:  $F(1,69) = 0.6, p > 0.4$ , Sex:  $F(1,69) = 0.3, p > 0.5$ , VPAC2 Antagonist\*Sex:  $F(1,69) = 0.0, p > 0.9$ , V1 Agonist\*Sex:  $F(1,69) = 0.0, p > 0.9$ , VPAC2 Antagonist\*V1 Agonist\*Sex:  $F(1,69) = 2.2, p > 0.1$ , Damping FF ANOVA, VPAC2 Antagonist:  $F(1,69) = 0.0, p > 0.8$ , V1 Agonist:  $F(1,69) = 0.3, p > 0.5$ , VPAC2 Antagonist\*V1 Agonist:  $F(1,69) = 3.8, p = 0.06$ , Sex:  $F(1,69) = 0.0, p > 0.9$ , VPAC2 Antagonist\*Sex:  $F(1,69) = 0.5, p > 0.4$ , V1 Agonist\*Sex:  $F(1,69) = 0.5, p > 0.5$ , VPAC2 Antagonist\*V1 Agonist\*Sex:  $F(1,69) = 0.0, p > 0.8$

\* Sex difference,  $p < 0.05$ . # Agonist different from Vehicle,  $p < 0.05$ . † Inhibitor difference,  $p < 0.05$

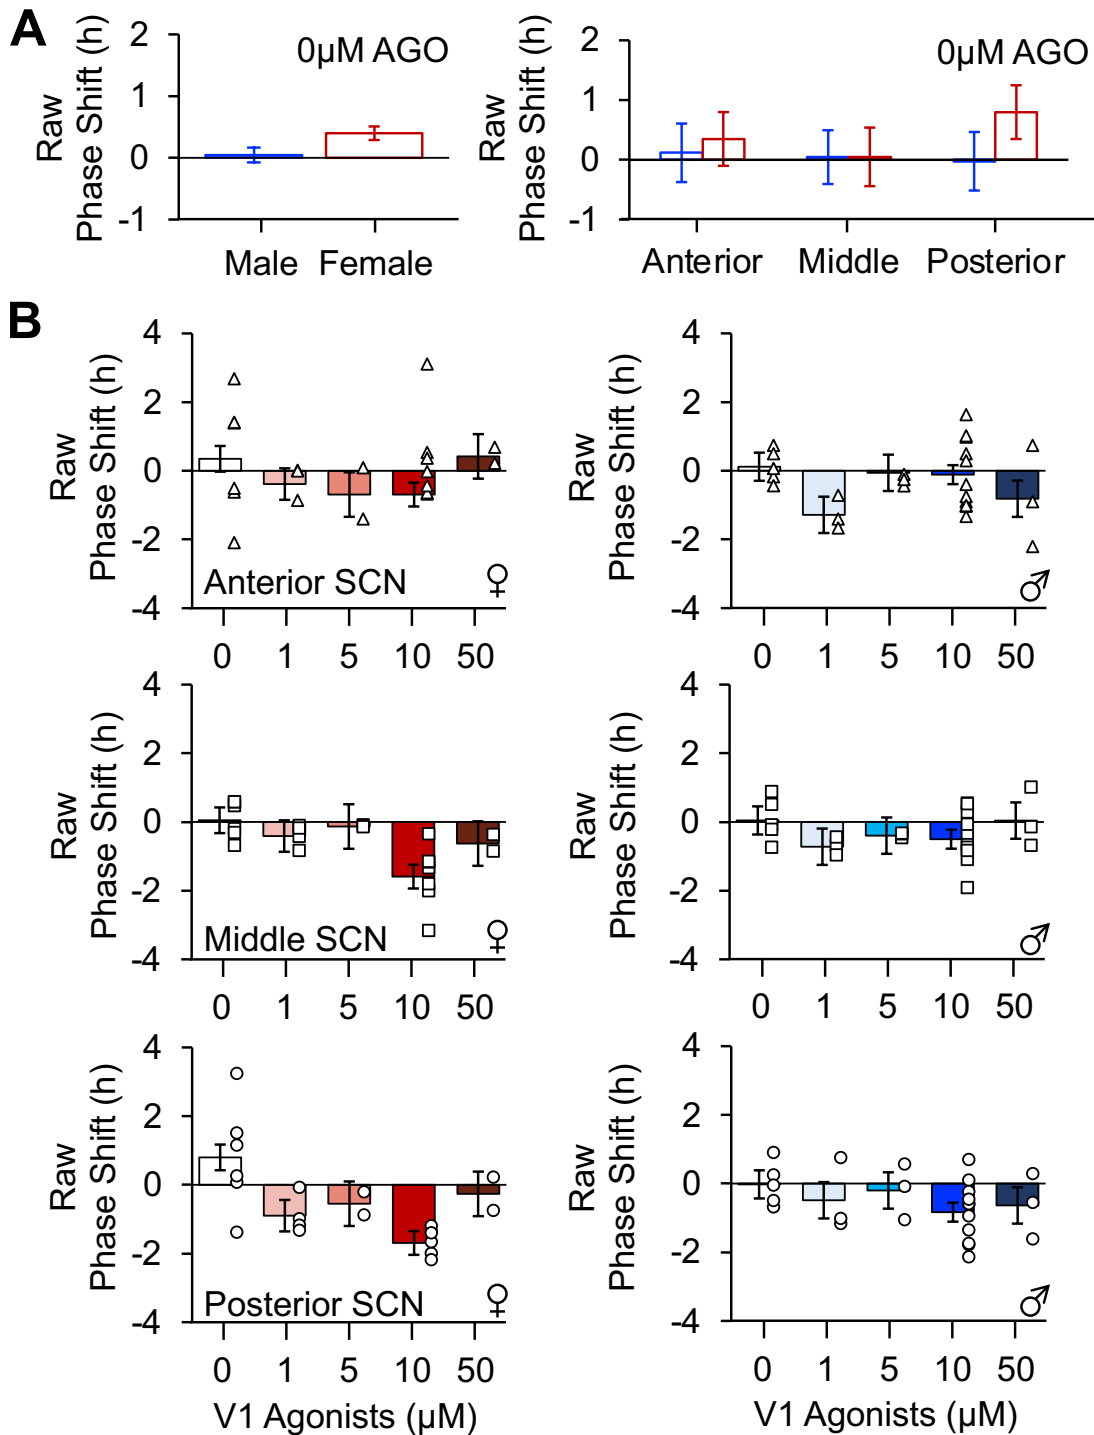

**Supplemental Figure S1. V1A/B receptor agonists reset PER2::LUC rhythms in a dose- and sex-dependent manner.** A. Phase shifting responses to vehicle administration. B. Phase shifting responses to vehicle and V1A/B agonist treatment divided by sex and SCN slice position. Scatterplot indicates data for individual samples. # Different from Vehicle. Estimated Marginal Means Contrasts:  $p < 0.05$ . + Different from zero, Single sample t-test:  $p < 0.05$ . \* Different by sex, Estimated Marginal Means Contrasts:  $p < 0.05$ .

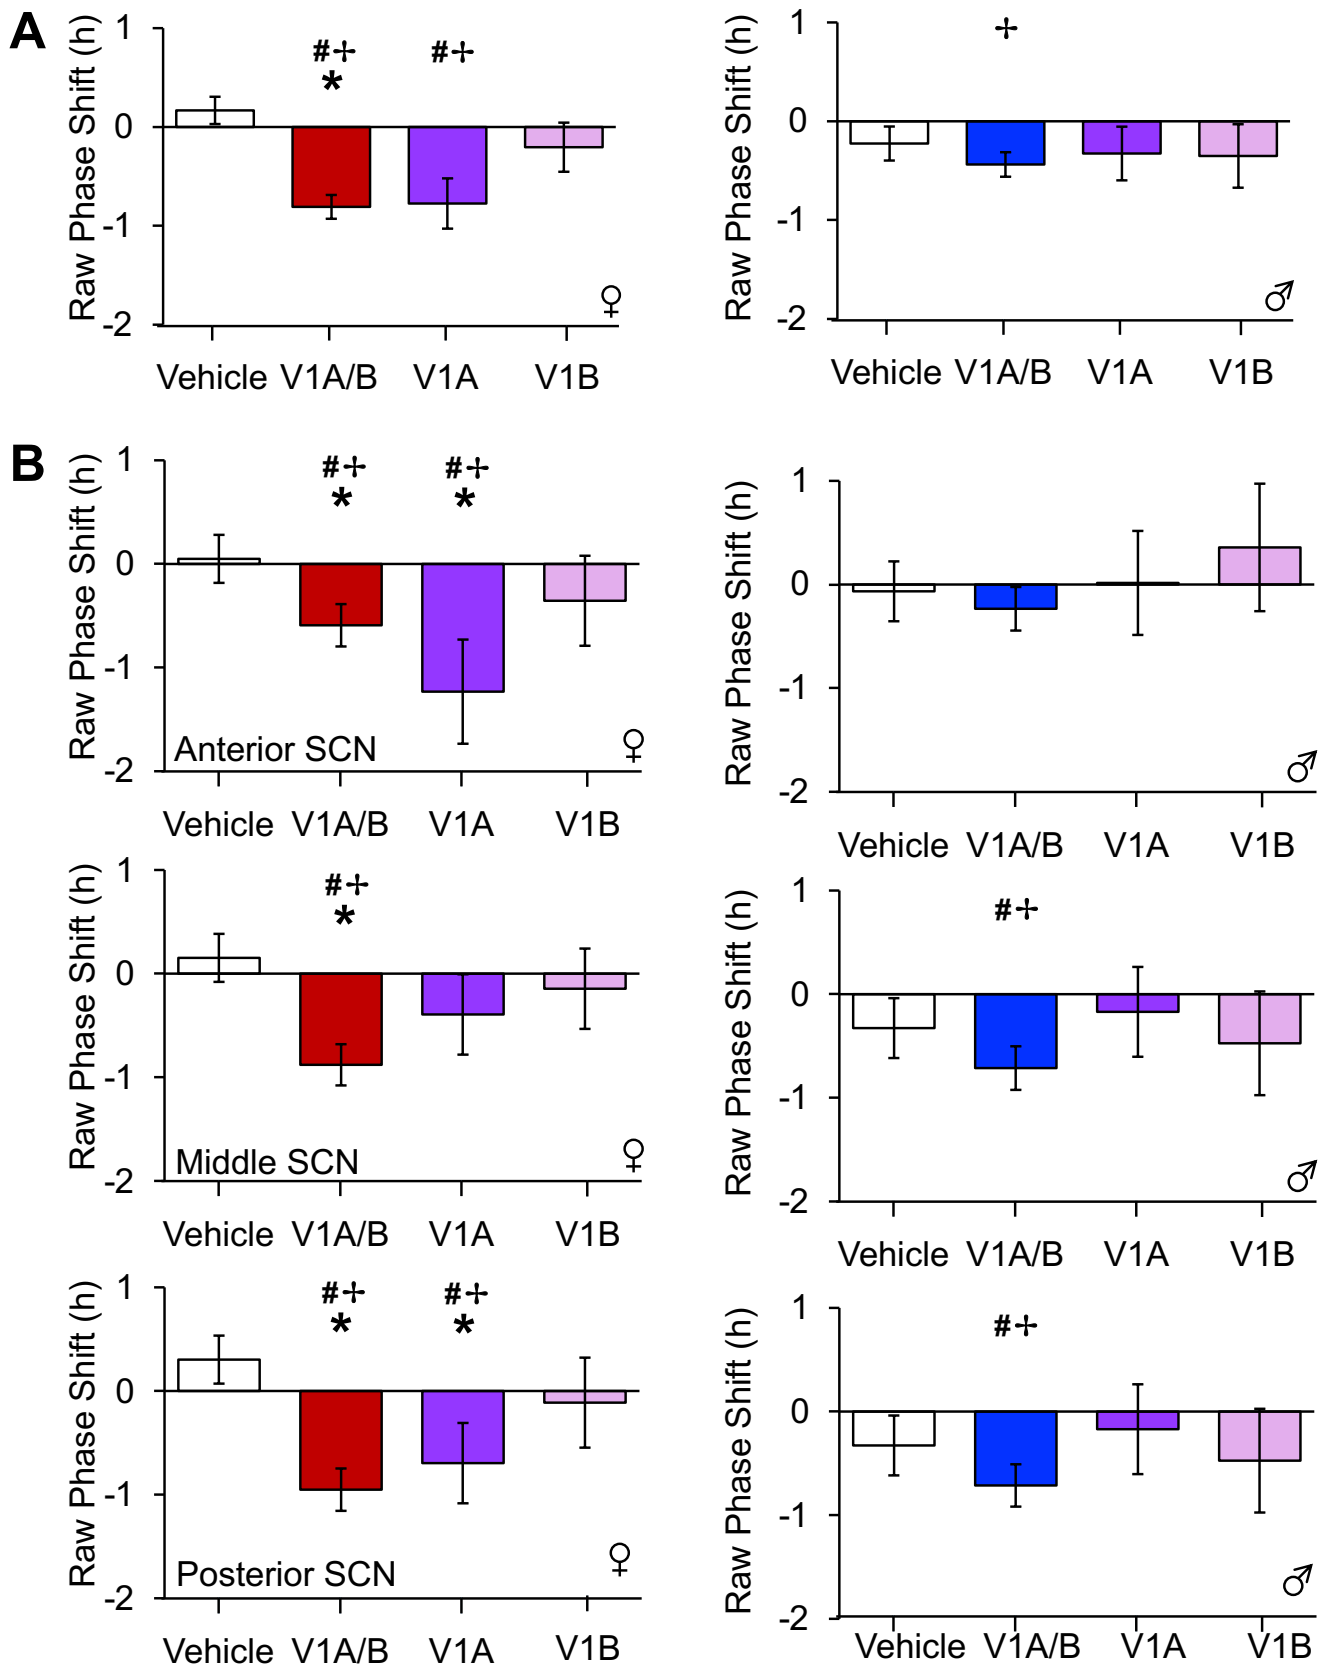

**Supplemental Figure S2. SCN resetting to single V1 agonists divided by sex position.**

# Different from Vehicle. Estimated Marginal Means Contrasts:  $p < 0.05$ . + Different from zero, Single sample t-test:  $p < 0.05$ . \* Different by sex, Estimated Marginal Means Contrasts:  $p < 0.05$ .

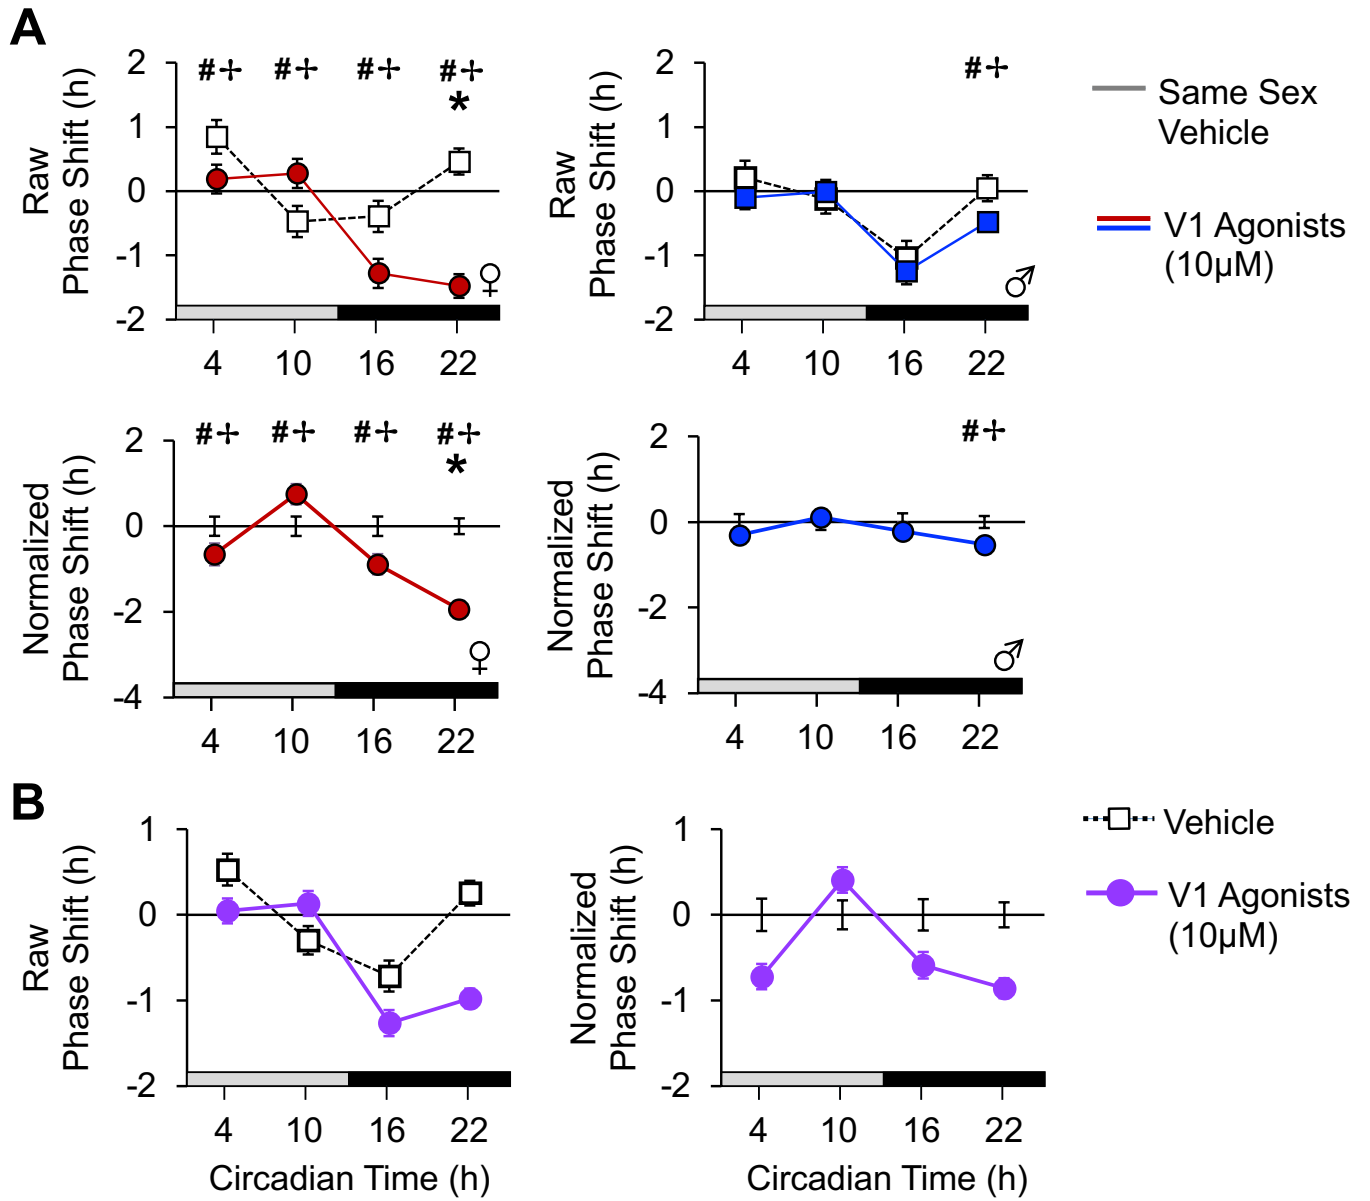

**Supplemental Figure S3. SCN resetting to V1A/B agonists at different circadian times.** # Different from Vehicle. Estimated Marginal Means Contrasts:  $p < 0.05$ . + Different from zero, Single sample t-test:  $p < 0.05$ . \* Different by sex, Estimated Marginal Means Contrasts:  $p < 0.05$ .

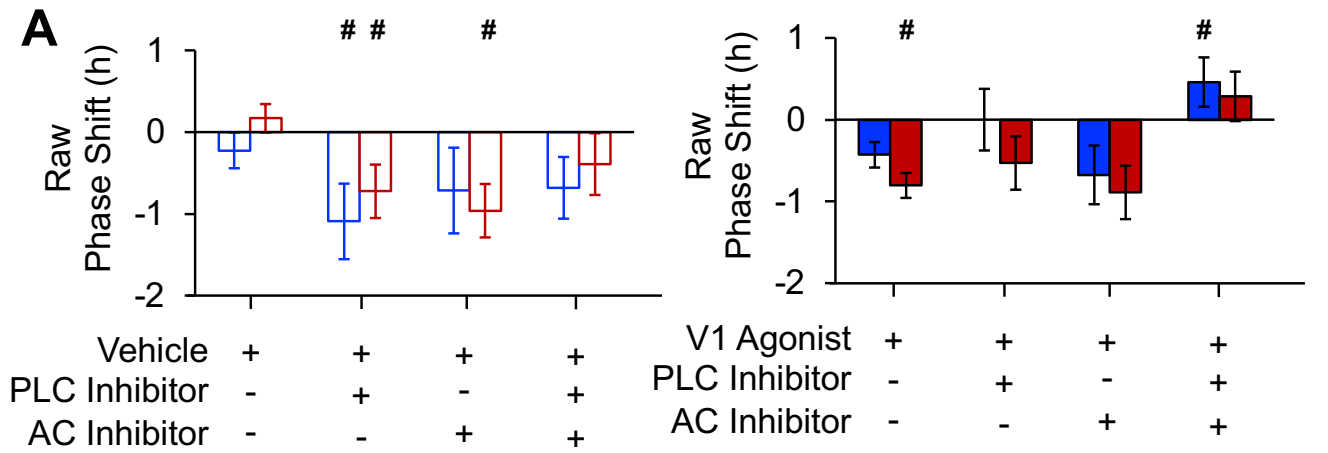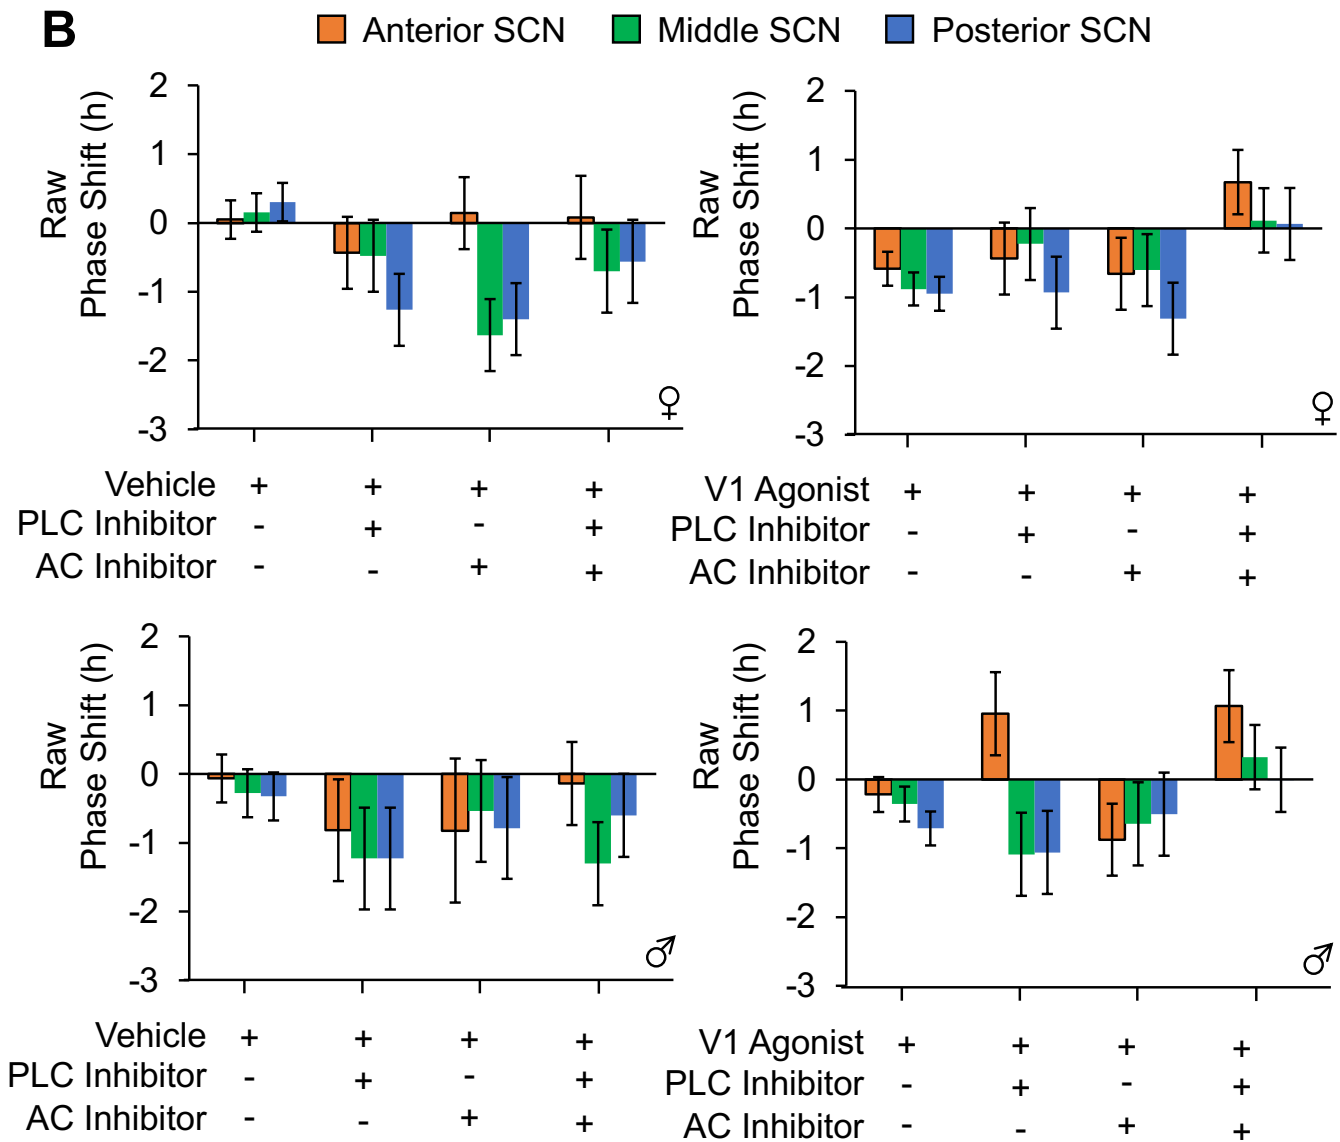

**Supplemental Figure S4. SCN resetting to PLC, AC, and V1 agonists.** # Different from Vehicle. Estimated Marginal Means Contrasts:  $p < 0.05$ . + Different from zero, Single sample t-test:  $p < 0.05$ . \* Different by sex, Estimated Marginal Means Contrasts:  $p < 0.05$ .

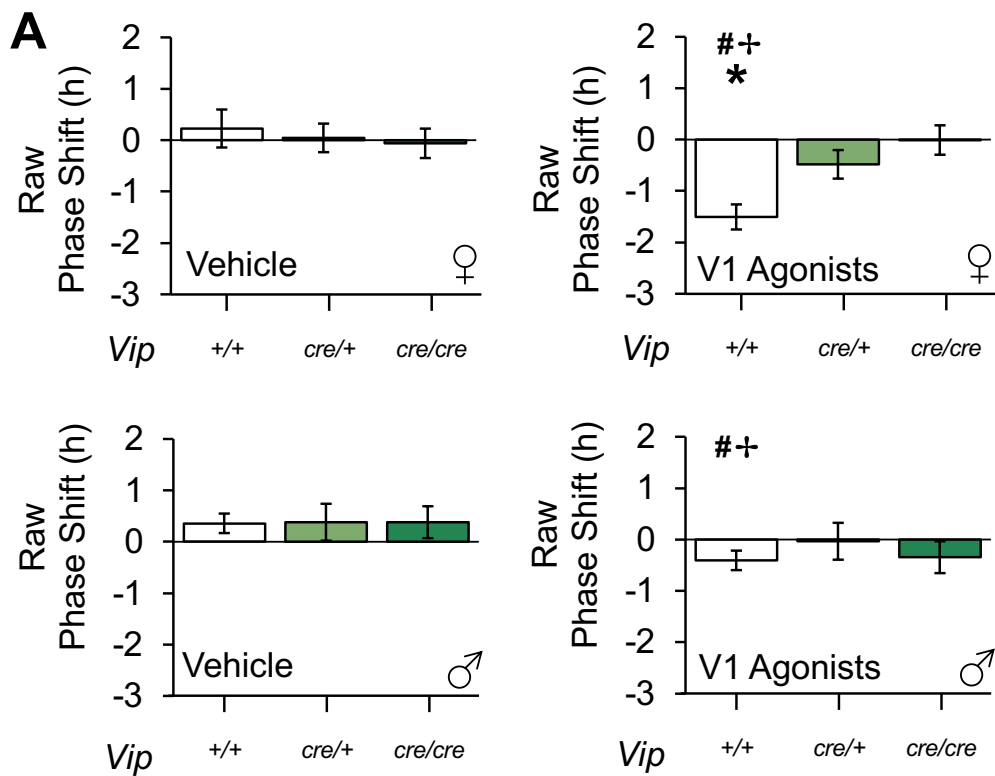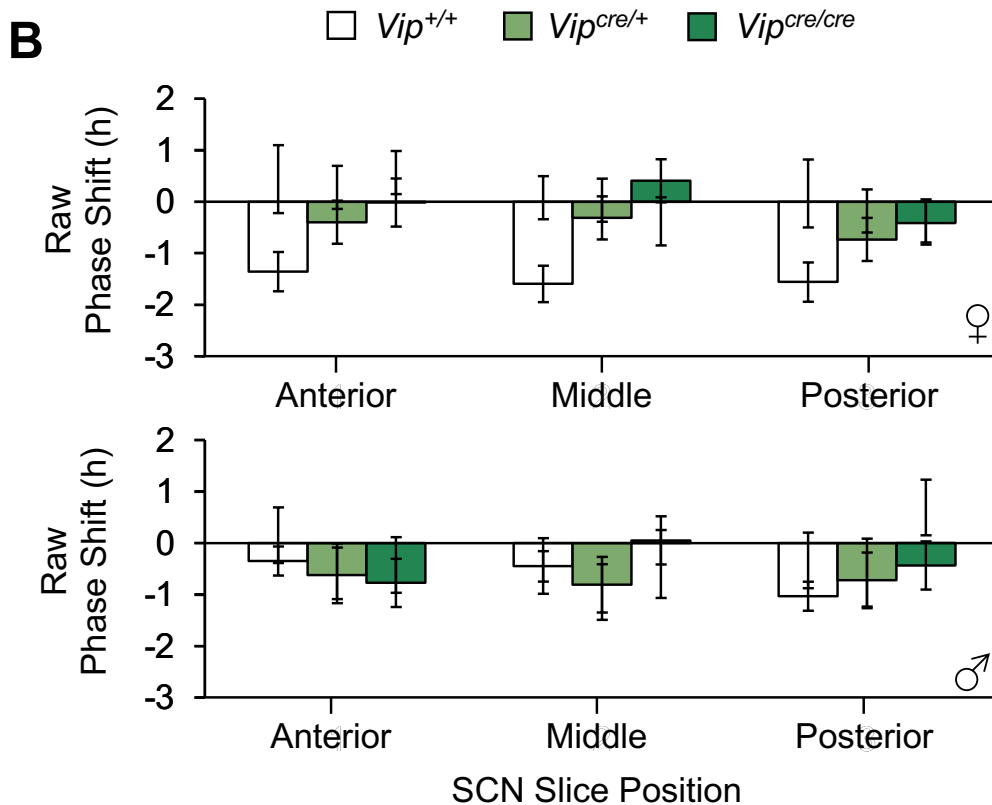

**Supplemental Figure S5. VIP deficiency blocks V1A/B-induced SCN resetting**  
 # Different from Vehicle. Estimated Marginal Means Contrasts:  $p < 0.05$ . + Different from zero, Single sample t-test:  $p < 0.05$ . \* Different by sex, Estimated Marginal Means Contrasts:  $p < 0.05$ .

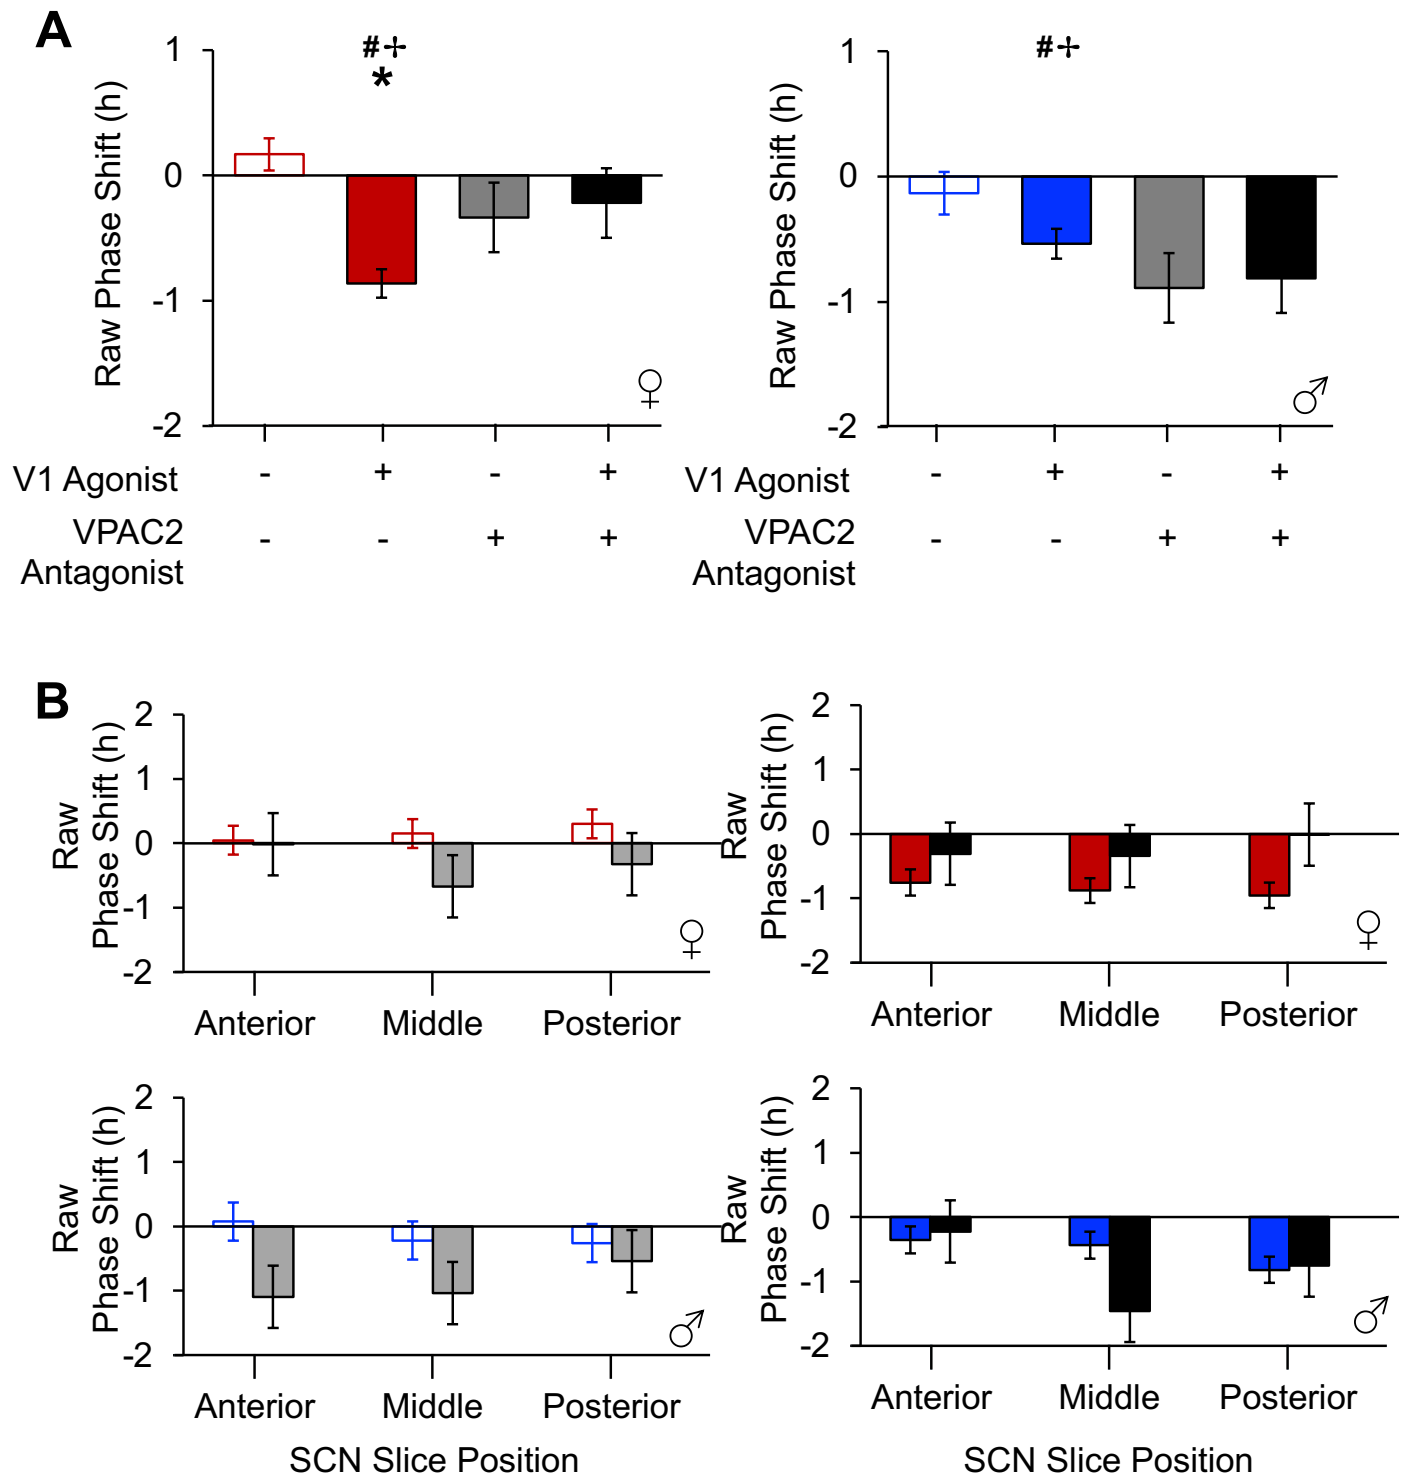

**Supplemental Figure S6. VPAC2 antagonist blocks V1-induced resetting.** A-B. VPAC2 antagonist co-administration blocked V1-induced SCN resetting. \* Different by sex, Estimated Marginal Means Contrasts:  $p < 0.05$ . + Different from zero, Single sample t-test:  $p < 0.05$  (symbols color coded in S2B based on Antagonist).
